# Supplementary material
Source: PubMed Central journal article supplement (PMC2268775)
Supplement: pnas_0710525105_3.pdf [file pnas_0710525105_3.pdf]

**Table 2. Riboflavin binding to Fe and Mn oxide minerals**

| Sample                | % Riboflavin bound to metal surface |
|-----------------------|-------------------------------------|
| Control (no addition) | 0                                   |
| 105 mM Fe(III)        | 77                                  |
| 210 mM Fe(III)        | 89                                  |
| 524 mM Fe(III)        | 92                                  |
| 71 mM Mn(IV)          | 97                                  |
| 142 mM Mn(IV)         | 99.5                                |

Riboflavin (1.33  $\mu\text{M}$ ) was used for all experiments. Samples were incubated overnight at ambient temperature with rocking agitation while protected from light. Fluorescence was measured (440-nm excitation, 525-nm emission) after centrifugation to remove metal oxides.
